# Supplementary material for: Natural Cyclophilin A Inhibitors Suppress the Growth of Cancer Stem Cells in Non-Small Cell Lung Cancer by Disrupting Crosstalk between CypA/CD147 and EGFR
Source: MDPI journal article supplement (doi:10.3390/ijms24119437), 2023-05-29
Supplement: s1 [file s1]

# Natural Cyclophilin A Inhibitors Suppress the Growth of Cancer Stem Cells in Non-Small Cell Lung Cancer by Disrupting Crosstalk between CypA/CD147 and EGFR

Jang Mi Han <sup>1</sup>, Sung Min Kim <sup>1</sup>, Hong Lae Kim <sup>2</sup>, Hee Jeong Cho <sup>1</sup> and Hye Jin Jung <sup>1,2,3,\*</sup>

<sup>1</sup> Department of Life Science and Biochemical Engineering, Graduate School, Sun Moon University, Asan 31460, Republic of Korea; gkswkdal200@naver.com (J.M.H.); tjdaals8855@gmail.com (S.M.K.); tjdrjd@naver.com (H.J.C.)

<sup>2</sup> Department of Pharmaceutical Engineering and Biotechnology, Sun Moon University, Asan 31460, Republic of Korea; llee5405@gmail.com

<sup>3</sup> Genome-Based BioIT Convergence Institute, Sun Moon University, Asan 31460, Republic of Korea

\* Correspondence: poka96@sunmoon.ac.kr; Tel.: +82-41-530-2354; Fax: +82-41-530-2939

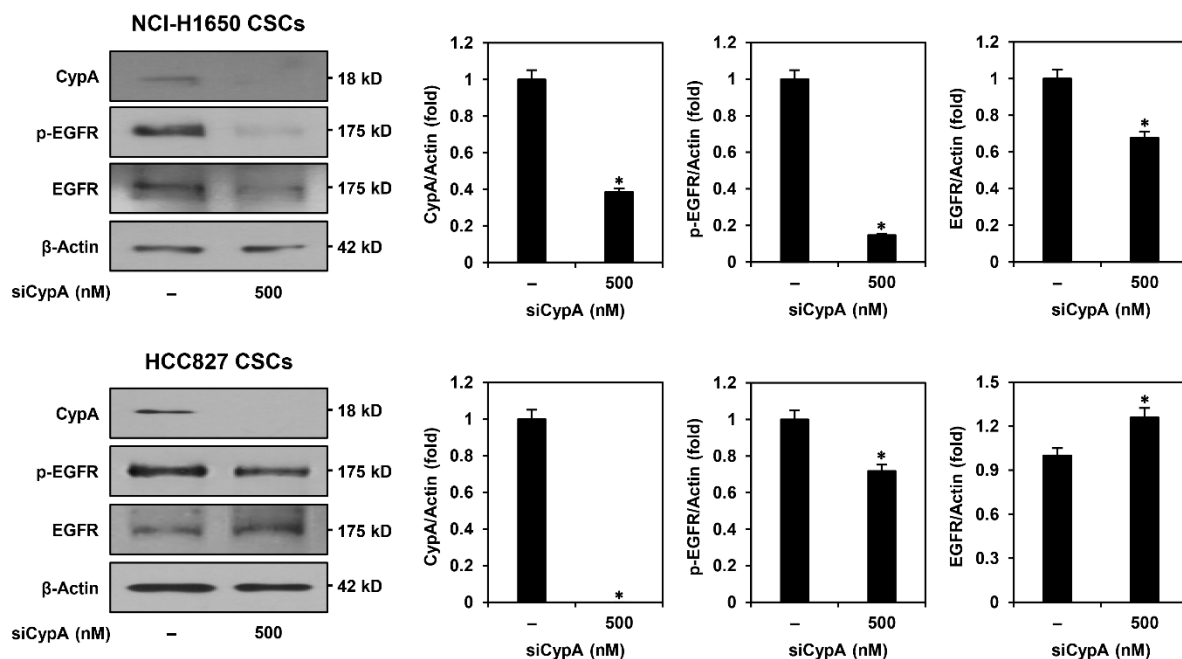

**Figure S1.** Effect of CypA knockdown on the phosphorylation of EGFR in NCI-H1650- and HCC827-derived NSCLC CSCs. Protein levels were detected by western blot analysis using specific antibodies and were further quantified by densitometry.  $\beta$ -Actin levels were used as an internal control. \*  $p < 0.05$  vs. the control group.

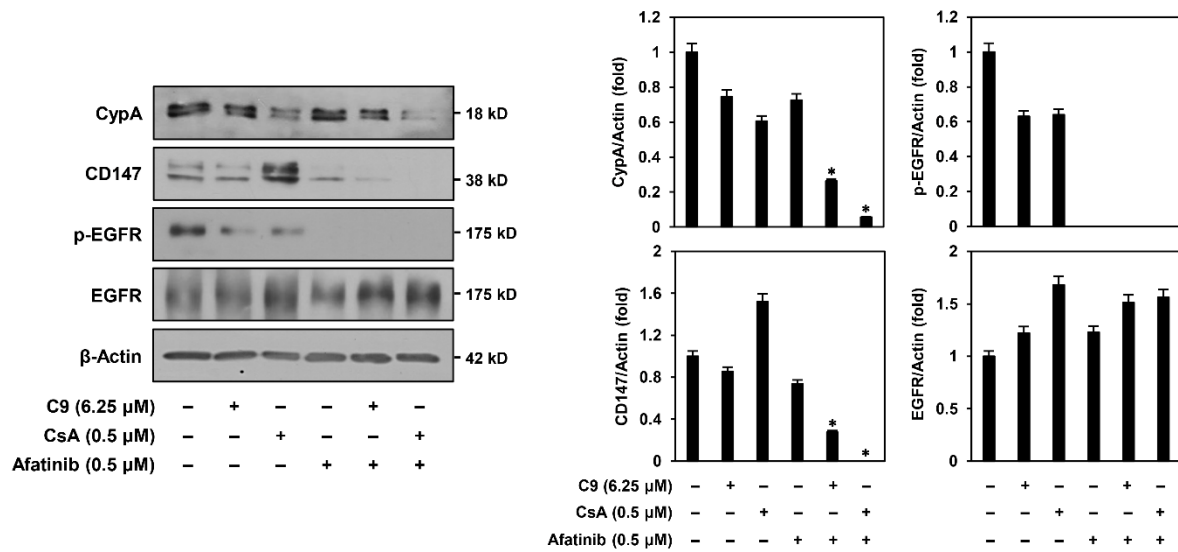

**Figure S2.** Effect of combined treatment with CypA inhibitors and afatinib on the expression levels of CypA, CD147, and p-EGFR in NCI-H1650-derived NSCLC CSCs. Protein levels were detected by western blot analysis using specific antibodies and were further quantified by densitometry.  $\beta$ -Actin levels were used as an internal control. \*  $p < 0.05$  vs. the compound alone.
